# Supplementary material for: Following the long-term evolution of sp 3 -type defects in tritiated graphene using Raman spectroscopy
Source: Royal Society of Chemistry journal article supplement (doi:10.1039/d5na01051a), 2026-01-01
Supplement: d5na01051a1.pdf [file d5na01051a1.pdf]

## Supplementary material

# Following the Long-Term Evolution of $\text{sp}^3$ -type Defects in Tritiated Graphene using Raman Spectroscopy

G. Zeller<sup>1,\*</sup>, M. Schlösser<sup>1</sup> and H.H. Telle<sup>2</sup>

<sup>1</sup> Tritium Laboratory Karlsruhe (TLK), Institute for Astroparticle Physics (IAP), Karlsruhe Institute of Technology (KIT), Hermann-von-Helmholtz-Platz 1, 76344 Eggenstein-Leopoldshafen, Germany

<sup>2</sup> Departamento de Química Física Aplicada, Universidad Autónoma de Madrid, Campus Cantoblanco, 28049 Madrid, Spain

\* Correspondence: [genrich.zeller@kit.edu](mailto:genrich.zeller@kit.edu)

## Table of Content

|                                                                                                | page |
|------------------------------------------------------------------------------------------------|------|
| S1 – CRM Raman spectral sensitivity calibration based on the NIST SRM 2242a standard .....     | 1    |
| S2 – Representative Raman spectra for all samples, with Lorentzian fit to Raman features ..... | 2    |
| S3 – Information extracted from the Raman spectroscopic maps of the samples .....              | 3    |
| S3.1 – Numerical values for all Raman map points, and their graphical representation .....     | 5    |
| S3.2 – Concept for the determination of the concentrations of defect types .....               | 6    |
| S3.3 – Example calculation .....                                                               | 7    |
| References .....                                                                               | 8    |

## S1 – CRM Raman spectral sensitivity calibration based on the NIST SRM 2242a standard

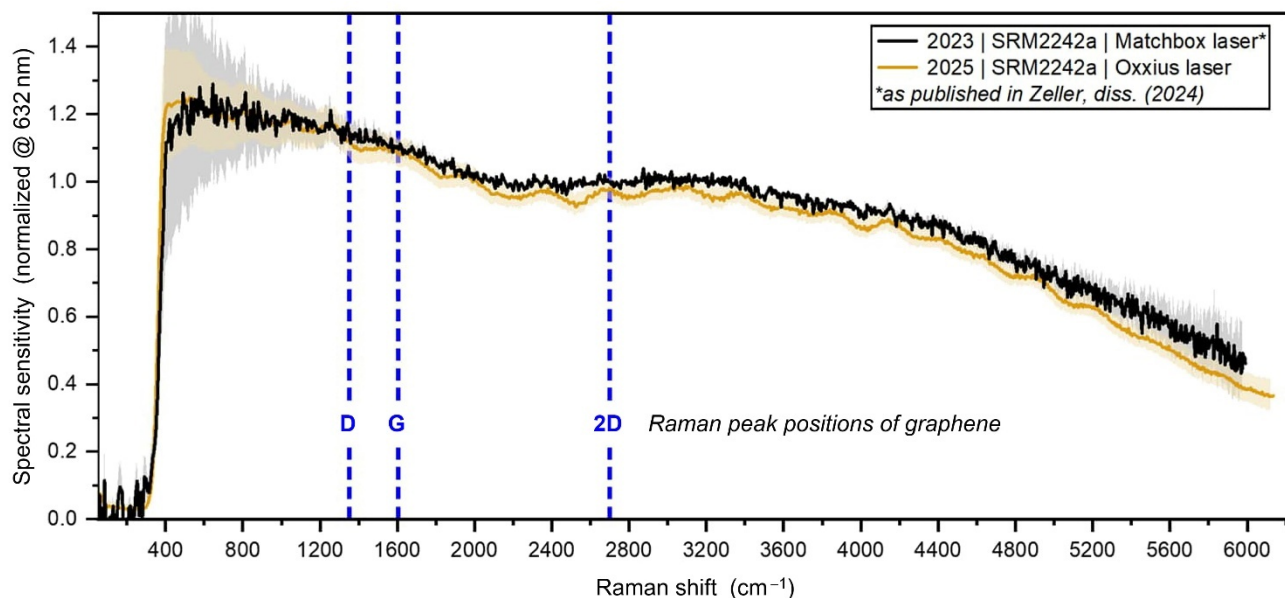

**Figure S1:** Long-term stability and comparability of the Raman system, based on response measurements using the NIST SRM 2242a standard.<sup>39</sup> The sensitivity curves for different years and hardware configurations (including new gratings and a replaced laser) agree within 1 $\sigma$  uncertainties, demonstrating year-over-year cross-comparability. The curves are normalized to =1 at the wavelength of the fluorescence emission maximum of the standard.

## S2 – Representative Raman spectra for all samples, with Voigt fits to Raman features

For the fit procedure, pseudo-Voigt profile functions were utilised.<sup>40,41</sup> In an often-used mathematical description they are given as the linear combination

$$V(x; w_{(L)}, w_{(G)}) = \eta(r) \cdot L_V(x; w_{(V)}) + (1 - \eta(r)) \cdot G_V(x; w_{(V)}), \quad (1)$$

Its two common parameters are

- the width parameter  $\text{FWHM}_{(V)} \equiv w_{(V)} \approx 0.5346 \cdot w_{(L)} + \sqrt{w_{(G)} + 0.2166 \cdot w_{(L)}^2}$ , and

$$(2)$$

- the mixing parameter  $\eta(r) = 1.36603 \cdot r - 0.47719 \cdot r^2 + 0.11116 \cdot r^3$ , with  $r \equiv \frac{w_{(L)}}{w_{(V)}}$ .

$$(3)$$

Note that, in our fit implementation, the Lorentz ( $L$ ) and Gaussian ( $G$ ) component functions are taken in unit-height form and share the common width parameter,  $w_{(V)}$ ; thus, these line-shape functions are defined as

$$L(x; w_{(V)}) = \frac{w_{(V)}^2}{4 \cdot (x - x_c)^2 + w_{(V)}^2} \quad \text{and} \quad G(x; w_{(V)}) = \exp\left(-\frac{(x - x_c)^2}{2\sigma_{(G)}^2}\right). \quad (4)$$

Here the Gaussian component of  $V(x; w_{(L)}, w_{(G)})$  is associated with the resolution of the spectrometer, whose  $\text{FWHM}_{(G)}$  is evaluated from the analysis of the atomic line emission from a Ne-lamp (used for wavelength calibration of the spectrometer). For the spectrometer configuration used in campaign 0 this was  $\text{FWHM}_{(G)}(0) = 32 \pm 4 \text{ cm}^{-1}$ , while for campaigns I and II it was  $\text{FWHM}_{(G)}(\text{I,II}) = 9.6 \pm 0.7 \text{ cm}^{-1}$ .

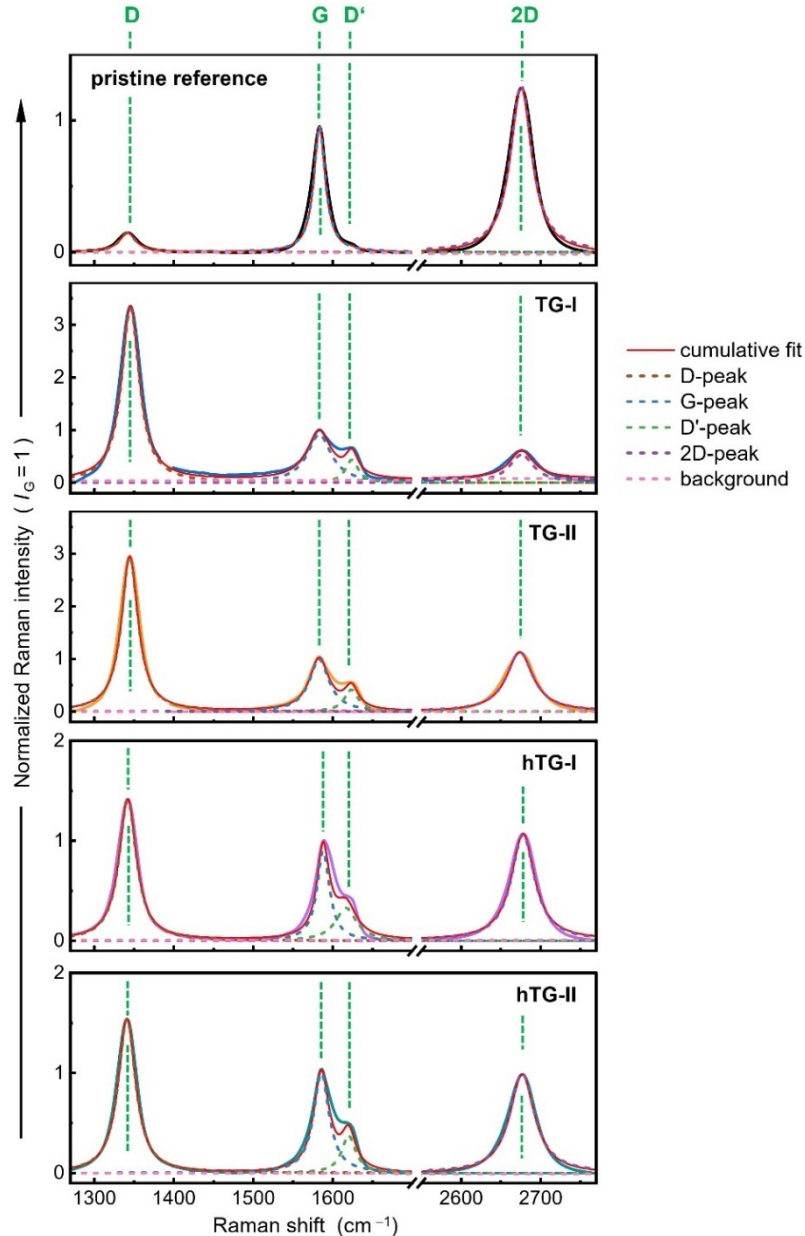

**Figure S2:** Representative Raman spectra of all sample data sets (pristine, TG-I, TG-II, hTG-I and hTG-II), shown with individual Voigt peak-fits and cumulative fit results. TG = tritiated graphene; hTG = heated tritiated graphene.

### S3 – Information extracted from the Raman spectroscopic maps of the samples

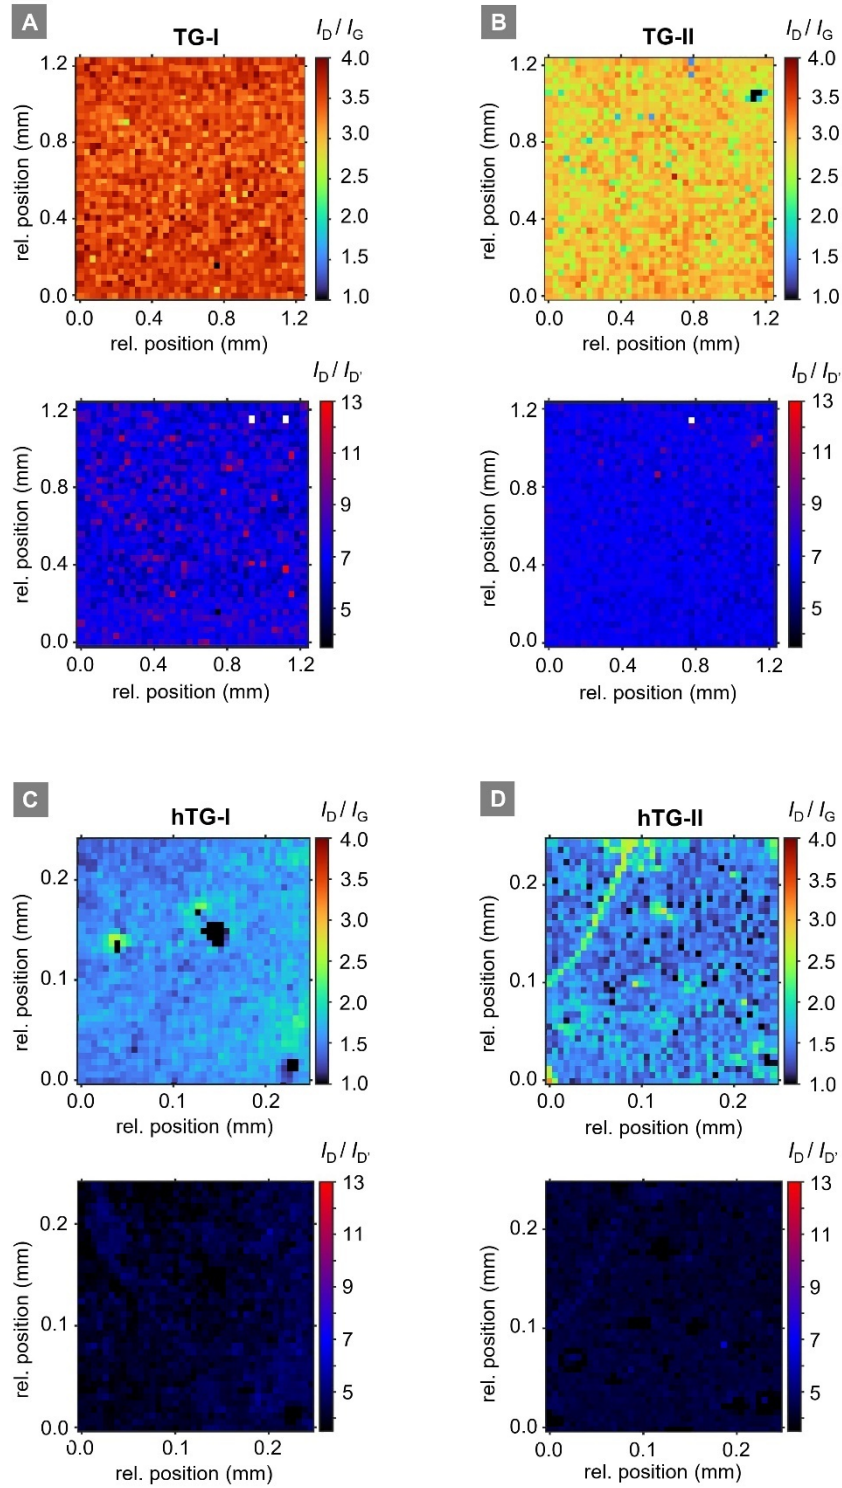

**Figure S3:** Raman spectroscopic maps of all graphene samples. Note that the one-year-later maps were not recorded for exactly equal areas of the samples. Top rows:  $I_D/I_G$  intensity ratios; bottom rows:  $I_D/I_{D'}$  intensity ratios.

- (A)  $1.2 \times 1.2 \text{ mm}^2$  area scan with step size of  $\Delta S=32 \text{ }\mu\text{m}$  of  $T_2$ -exposed graphene.
- (B)  $1.2 \times 1.2 \text{ mm}^2$  area scan with step size of  $\Delta S=32 \text{ }\mu\text{m}$  of  $T_2$ -exposed graphene, after one year of storage in laboratory atmosphere.
- (C)  $0.25 \times 0.25 \text{ mm}^2$  area scan with step size of  $\Delta S=7 \text{ }\mu\text{m}$  of  $T_2$ -exposed graphene, heated at  $500 \text{ }^\circ\text{C}$  for 24 h.
- (D)  $0.25 \times 0.25 \text{ mm}^2$  area scan with step size of  $\Delta S=7 \text{ }\mu\text{m}$  of heated  $T_2$ -exposed graphene, after one year of storage in laboratory atmosphere.

### S3.1 Numerical values for all Raman map points, and their graphical representation

From the line ratio maps for the D-, D'- and G-peaks displayed in Figure S3 one can extract the actual numerical values, and plot these in the form  $I_D/I_G$  versus  $I_D/I_{D'}$ . This plot is shown in Figure S4. Note that Figure 4 in the main text is a simplified representation of these data, in the form of a contour plot, lumping data points together around the mean (as  $1\sigma$ -,  $2\sigma$ - and  $3\sigma$  contours regions).

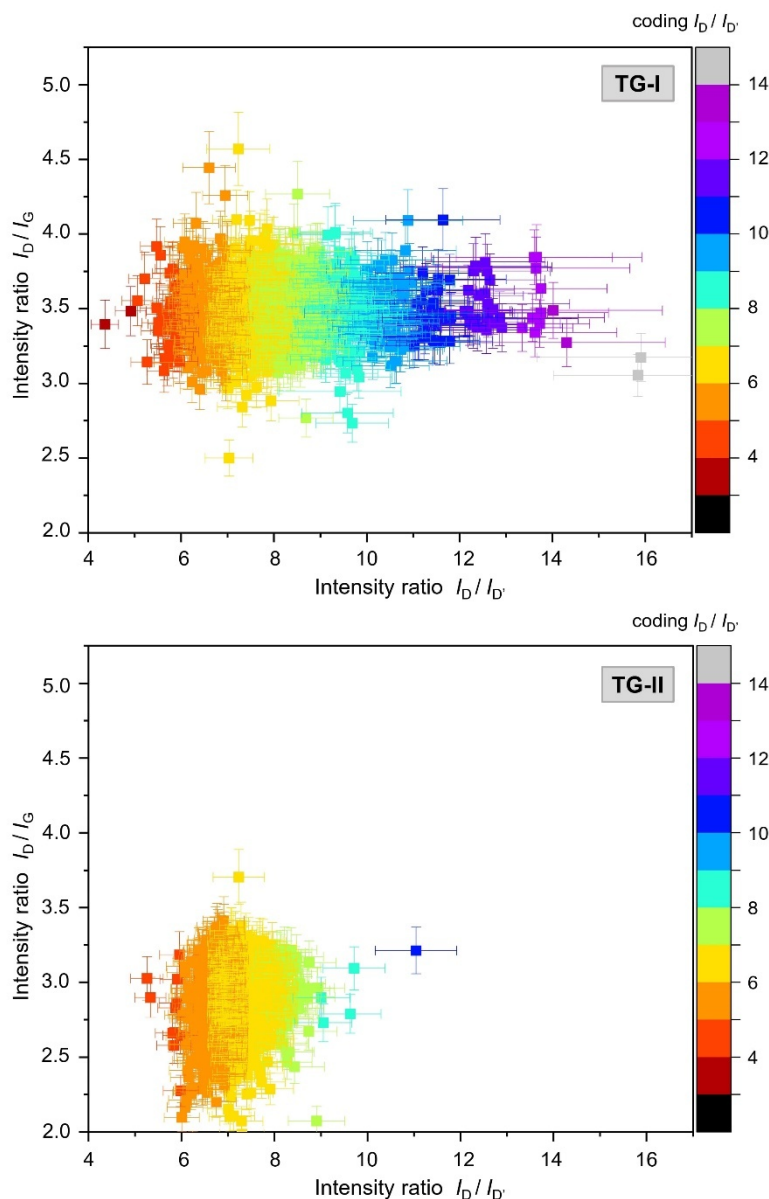

**Figure S4:** Intensity ratio plots of  $I_D/I_G$  versus  $I_D/I_{D'}$  of the  $40 \times 40$  data points from the Raman maps in Figures S3(a) and S3(b), including error bars for each individual data point.

Note that in the figure the D/D' classification values are colour-coded according to integer-value ranges (analogous to the defect-type limiters).

For classification and interpretation, the values for each integer range are summed up, and the sum-values are shown as relative fractions of the total in Figure 6 of the main text. Said diagram serves as a visualisation aid in the discussion of the defect-type densities.

All (mean) evaluation parameters used for the presentation and interpretation of the experimental data – i.e., numerical values (including errors) for peak position, peak width and intensity ratios for the relevant Raman features G, D, D' and 2D – are summarised in Table S1.

**Table S1:** Mean fit results for all data sets. Given uncertainties are calculated from individual per spectra uncertainties,  $\bar{u}_i$ , and spread of the data points,  $s$ :  $\sigma_{\text{tot}} = (\bar{u}_i^2 + s^2)^{1/2}$ . Note that, the individual uncertainties are much smaller than the spread of the data points within each data set, therefore, in first order, one can approximate  $\sigma_{\text{tot}} \approx s$ . The mixing parameter is defined in equation (4) of S2.

|                                            | Peaks                 | Pristine     | TG-I         | TG-II        | hTG-I        | hTG-II        |
|--------------------------------------------|-----------------------|--------------|--------------|--------------|--------------|---------------|
| Intensity ratio                            | D/G                   | 0.12 ± 0.01  | 3.51 ± 0.26  | 2.90 ± 0.28  | 1.60 ± 0.24  | 1.53 ± 0.29   |
|                                            | D'/G                  | 0.02 ± 0.01  | 0.49 ± 0.07  | 0.42 ± 0.05  | 0.38 ± 0.06  | 0.37 ± 0.11   |
|                                            | D/D'                  | 6.22 ± 1.50  | 7.18 ± 1.00  | 6.94 ± 0.56  | 4.22 ± 0.50  | 4.26 ± 0.32   |
|                                            | 2D / G                | 1.75 ± 0.10  | 0.70 ± 0.09  | 1.28 ± 0.27  | 1.36 ± 1.08  | 1.15 ± 0.16   |
|                                            | D / 2D                | 0.07 ± 0.01  | 5.07 ± 0.57  | 2.32 ± 0.37  | 1.22 ± 0.31  | 1.41 ± 0.71   |
| FWHM <sub>(L)</sub><br>in cm <sup>-1</sup> | D (w <sub>D</sub> )   | 54.2 ± 5.5   | 28.8 ± 1.3   | 27.4 ± 1.2   | 29.3 ± 3.5   | 31.8 ± 7.1    |
|                                            | G (w <sub>G</sub> )   | 16.3 ± 0.9   | 39.7 ± 6.2   | 33.8 ± 3.4   | 21.3 ± 4.0   | 26.5 ± 6.0    |
|                                            | D' (w <sub>D'</sub> ) | 21.8 ± 17.5  | 21.1 ± 6.5   | 22.4 ± 2.7   | 32.8 ± 8.7   | 23.6 ± 3.6    |
|                                            | 2D (w <sub>2D</sub> ) | 32.9 ± 0.7   | 41.6 ± 6.6   | 44.8 ± 6.7   | 37.4 ± 4.3   | 39.0 ± 6.0    |
| Position<br>in cm <sup>-1</sup>            | D                     | 1344.7 ± 1.2 | 1344.5 ± 3.3 | 1342.9 ± 0.8 | 1329.3 ± 1.3 | 1339.6 ± 4.7  |
|                                            | G                     | 1584.5 ± 0.9 | 1581.9 ± 3.9 | 1581.0 ± 1.3 | 1572.6 ± 1.5 | 1583.4 ± 5.6  |
|                                            | D'                    | 1621.1 ± 5.3 | 1622.7 ± 4.0 | 1621.8 ± 1.3 | 1601.3 ± 1.5 | 1618.7 ± 5.7  |
|                                            | 2D                    | 2677.0 ± 1.8 | 2674.0 ± 6.7 | 2672.7 ± 1.6 | 2652.2 ± 2.6 | 2673.8 ± 20.3 |
| Mixing<br>parameter $\eta$                 | D                     | 0.98 ± 0.01  | 0.93 ± 0.02  | 0.92 ± 0.01  | 0.92 ± 0.09  | 0.93 ± 0.03   |
|                                            | G                     | 0.83 ± 0.01  | 0.95 ± 0.03  | 0.94 ± 0.01  | 0.87 ± 0.09  | 0.91 ± 0.04   |
|                                            | D'                    | 0.83 ± 0.11  | 0.86 ± 0.07  | 0.89 ± 0.02  | 0.92 ± 0.10  | 0.89 ± 0.04   |
|                                            | 2D                    | 0.94 ± 0.01  | 0.96 ± 0.03  | 0.97 ± 0.00  | 0.94 ± 0.09  | 0.95 ± 0.04   |

### S3.2 Concept for the determination of the concentrations of defect types

By and large, defect types (x) may be separated into two broad classes, namely adsorption-type ( $x \equiv a$ ) and vacancy-type ( $x \equiv v$ ) defects. According to established, descriptive models for defects in graphene they manifest themselves in changes in the amplitude and shape of Raman spectral features. For stage-1 defect-density samples, i.e., samples with small to moderate defect densities, one can take away two key messages (based on said models):

- (i) the intensity ratio  $I_D/I_G$  is proportional to the defect density,  $L_D(x)$ , in units of (nm); and
- (ii) the intensity ratio  $I_D/I_{D'}$  yields distinct associations:  $I_D/I_{D'} \geq 13$  is indicative for adsorption defects;  $I_D/I_{D'} \leq 7$  for vacancy defects; and  $I_D/I_{D'}$  in the range 7...13 for mixed defects.

Note however that, mixing cannot necessarily be assumed to be linear.

The established model for vacancy-type defects is that by Lucchese and co-workers,<sup>32</sup> which was generalized for different laser excitation energies,  $E_L$  (in eV), by Cançado and co-workers.<sup>33</sup> The latter describes the relationship between  $I_D/I_G$  and  $L_D(v)$  as

$$\frac{I_D}{I_G}(L_D) = C_A \frac{r_A^2 - r_S^2}{r_A^2 - 2r_S^2} \cdot \left[ e^{-\pi \frac{r_S^2}{L_D^2}} - e^{-\pi \frac{r_A^2 - r_S^2}{L_D^2}} \right] + C_S \left[ 1 - e^{-\pi \frac{r_S^2}{L_D^2}} \right] \quad (5)$$

with  $C_A = 160 \cdot E_L^{-4} \cdot \text{eV}^{-4}$ ,  $C_S = 0.87 \pm 0.05$ ,  $r_A = (3.00 \pm 0.03) \text{ nm}$ , and  $r_S = (1.00 \pm 0.04) \text{ nm}$ .

Recently Fournier and co-workers published a model specifically tailored for  $sp^3$ -type defects.<sup>36</sup> There the relationship between  $I_D/I_G$  and  $L_D(a)$  is defined by

$$\frac{I_D}{I_G}(L_D) = \frac{C_S f_S(L_D) + C_A f_A(L_D)}{1 - f_{sp^3}(L_D)}, \quad (6)$$

where

$$f_A(L_D) = e^{-\pi \frac{r_S^2}{L_D^2}} - e^{-\pi \frac{r_A^2}{L_D^2}}, \quad f_S(L_D) = e^{-\pi \frac{r_{sp^3}^2}{L_D^2}} - e^{-\pi \frac{r_S^2}{L_D^2}} \quad \text{and} \quad f_{sp^3}(L_D) = 1 - e^{-\pi \frac{r_{sp^3}^2}{L_D^2}}, \quad (7)$$

and  $C_A = 20.1$ ,  $C_S = 0.86$ ,  $r_A = 0.242 \text{ nm}$ ,  $r_S = 0.183 \text{ nm}$  and  $r_{sp^3} = 0.0913 \text{ nm}$ .

When evaluating and comparing our data – using these two models – one finds that, the Raman response to the two defect types is significantly more sensitive for vacancy-type defects than for adsorption-type defects. For example, a value of  $I_D/I_G = 0.1$  would correspond to

$$L_D(\text{Lucchese / Cançado}) = 37.1 \text{ nm} , \text{ or}$$

$$L_D(\text{Fournier}) = 4.1 \text{ nm} .$$

This means that, when quantitatively comparing data sets, for compositional changes, both variations in  $I_D/I_G$  and  $I_D/I_D$  need to be tracked in parallel.

### S3.3 Example calculation

Simplified versions of the complex equations (1) and (2) can be found in the literature, which allow for an analytical inversion; however, these are in general only applicable in the low-defect density regime. Since this is not the case for the samples studied in this work, we use a different approach.

In order to accurately evaluate the defect density,  $L_D$ , from the intensity ratio,  $I_D/I_G$ , we calculate the correlation curves according to the two models, and then perform numerical interpolation. This principle is visualised for the TG-I data in Figure S5.

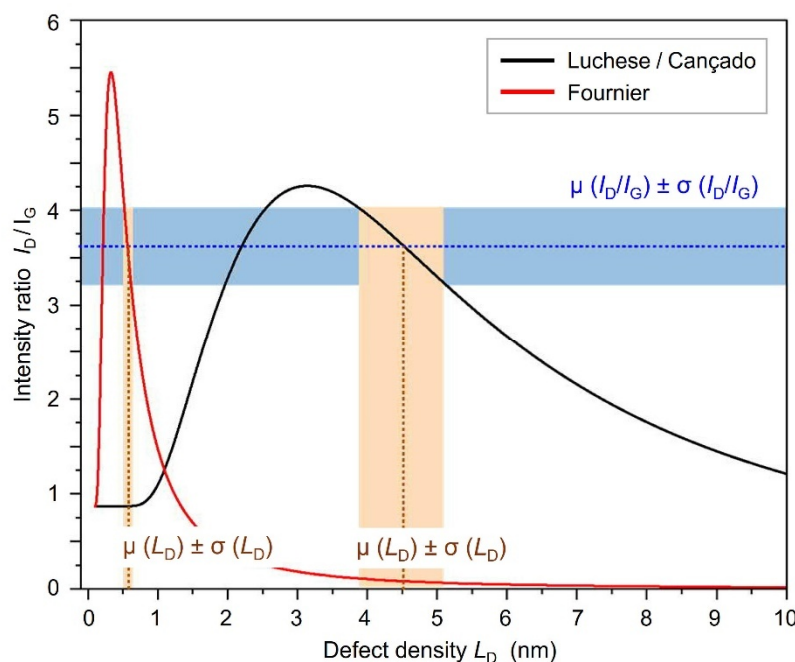

**Figure S5:** Calculated numerical  $I_D/I_G$  vs  $L_D$  curves, according to the models of Lucchese/Cançado and Fournier. The blue dotted line and the blue band correspond to the mean  $I_D/I_G$  with  $1\sigma$  standard uncertainty of the TG-I data set. As it is shown in the main document, the TG-I data fall to the low-defect regime (Stage 1); therefore, the crossing at smaller  $L_D$ -values is correct here. The orange lines and bands visualise the  $L_D$ -values and their uncertainties; they are obtained by numerically interpolating the intersection points with the blue line, and their uncertainty, for each of the two model curves.

## References

- 32 M.M. Lucchese, F. Stavale, E.H. Martins Ferreira, C. Vilani, M.V.O. Moutinho, R.B. Capaz, C.A. Achete, A. Jorio, Quantifying ion-induced defects and Raman relaxation length in graphene, *Carbon* 2010, **48** (5), 1592-1597. <https://doi.org/10.1016/j.carbon.2009.12.057>
- 33 L. G. Cançado, A. Jorio, E. H. M. Ferreira, F. Stavale, C. A. Achete, R. B. Capaz, M. V. O. Moutinho, A. Lombardo, T. S. Kulmala and A. C. Ferrari, Quantifying defects in graphene via Raman spectroscopy at different excitation energies, *Nano Lett*, 2011, **11**, 3190–3196. <https://doi.org/10.1016/j.carbon.2024.118801>
- 36 T. Fournier, C. Crespos, I. Arshad, M. Dubois, B. Lassagne, M. Monthieux, F. Piazza and P. Puech, Quantifying the  $sp^3/sp^2$  ratio in functionalized graphene, *Carbon*, 2025, **244**, 120657. <https://doi.org/10.1016/j.carbon.2025.120657>
- 39 C.A. Gonzalez and S.J. Choquette; Chemical Sciences Division Standard Reference Material® 2242a Relative Intensity Correction Standard for Raman Spectroscopy: 532 nm Excitation, Certificate, Issue 20 June 2025. National Institute of Standards and Technology (NIST), Gaithersburg (MD), USA. <https://tsapps.nist.gov/srmext/certificates/2242a.pdf> [accessed November 6, 2025]
- 40 J.J. Olivero and R.L. Longbothum, Empirical fits to the Voigt line width: A brief review, *JQSRT*, 1977, **17** (2), 233-236.
- 41 J. Rodríguez-Carvajal, *FullProf Manual*, Institut Laue–Langevin (ILL), Grenoble, France, 2001. [https://www.ill.eu/sites/fullprof/downloads/Docs/FullProf\\_Manual.pdf](https://www.ill.eu/sites/fullprof/downloads/Docs/FullProf_Manual.pdf) [accessed November 6, 2025]
